# Supplementary material for: Oleaginous Heterotrophic Dinoflagellates—Crypthecodiniaceae
Source: MDPI journal article supplement (doi:10.3390/md21030162), 2023-02-28
Supplement: s1 [file s1]

**Table S1.** Primers.

| Target region | Primer      | Sequence (5' to 3')      |
|---------------|-------------|--------------------------|
| LSU rDNA      | LSU_D1R-F   | ACCCGCTGAATTTAAGCATA     |
|               | LSU_R2-R    | ATTCGGCAGGTGAGTTGTTAC    |
| SSU rDNA      | SSU_SR1-F   | TACCTGGTTGATCCTGCCAG     |
|               | SSU_SR12b-R | CGGAAACCTTGTTACGACTTCTCC |
| ITS           | ITS_SR12cF  | TAGAGGAAGGAGAAGTCGTAA    |
|               | ITSrev      | ATATGCTTAAATTCAGCGGGT    |
| Cc18          | Cc18-F      | CAGTTCCTGAAGTTATTCGGCTCC |
|               | Cc18-R      | TGGGATGTCGCTGGGGTC       |
| Cc20          | Cc20-F      | TGCAGACTGAATCCTTTGGC     |
|               | Cc20-R      | GCTTTTGGAGAGACTACTACAGG  |

**Table S2.** Genbank accession numbers of the dinoflagellate rDNA sequences in phylogenetic tree analyses.

| Organism / Strain                          | GenBank accession number |            |            |
|--------------------------------------------|--------------------------|------------|------------|
|                                            | SSU                      | LSU        | ITS        |
| <i>Cryptocodinium cohnii</i> ATCC30021     | OQ184972 *               | OQ184965 * | OQ190440 * |
| <i>Cryptocodinium cohnii</i> ATCC30336     | FJ821501.1               | -          | -          |
| <i>Cryptocodinium cohnii</i> ATCC30556     | OQ184973 *               | OQ184966 * | OQ190441 * |
| <i>Cryptocodinium cohnii</i> CC1           | OQ184971 *               | OQ184964 * | OQ190439 * |
| <i>Cryptocodinium cohnii</i> CCMP316       | KM068037.1               | FJ939575.1 | FJ823534.1 |
| <i>Cryptocodinium</i> sp. CAAE-CL2         | DQ322643.1               | -          | -          |
| <i>Cryptocodinium</i> sp. D31              | AB811790.1               | AB811791.1 | -          |
| <i>Cryptocodinium</i> sp. SUN              | KY263646.1               | -          | -          |
| <i>Cryptocodinium ryukyu</i> ISG40-1       | AB871546                 | AB871537   | AB871528.1 |
| <i>Cryptocodinium ryukyu</i> ISK-1         | AB871544                 | AB871535   | AB871526.1 |
| <i>Cryptocodinium ryukyu</i> ISK-2         | AB871545                 | AB871536   | AB871527.1 |
| <i>Cryptocodinium okinawan</i> OKI5-1      | AB871551                 | AB871542   | AB871533.1 |
| <i>Cryptocodinium okinawan</i> SS2-2       | AB871552                 | AB871543   | AB871534.1 |
| <i>Cryptocodinium okinawan</i> SZ7-1       | AB871550                 | AB871541   | AB871532.1 |
| <i>Cryptocodinium okinawan</i> SZ13-1      | AB871547                 | AB871538   | AB871529.1 |
| <i>Cryptocodinium okinawan</i> SZ13-2      | AB871548                 | AB871539   | AB871530.1 |
| <i>Cryptocodinium okinawan</i> SZ13-3      | AB871549                 | AB871540   | AB871531.1 |
| <i>Cryptocodinium croucheri</i> HKUST-1001 | OQ184974 *               | OQ184967 * | OQ190442 * |
| <i>Cryptocodinium croucheri</i> HKUST-1002 | OQ184975 *               | OQ184968 * | OQ190443 * |
| <i>Cryptocodinium croucheri</i> HKUST-1003 | OQ184976 *               | OQ184969 * | OQ190444 * |
| <i>Cryptocodinium croucheri</i> HKUST-1006 | OQ184977 *               | OQ184970 * | OQ190445 * |
| Undescribed <i>Cryptocodinales</i> R6      | OQ297750 *               | OQ297748 * | OQ190446 * |
| <i>Alexandrium catenella</i>               | AJ535392.1               | DQ785887.1 | KF924271.1 |
| <i>Amphidinium carterae</i>                | AF274251.1               | AY460585.1 | EU927575.1 |
| <i>Cryptoperidiniopsoid</i> sp. brodyi     | AF080097.1               | -          | -          |
| <i>Cryptoperidiniopsoid</i> sp. C          | AY251292.1               | -          | -          |
| <i>Cryptoperidiniopsoid</i> sp. Folly C5   | AY590481.1               | AY590481.1 | AY590481.1 |
| <i>Cryptoperidiniopsoid</i> sp. H/V14      | AY245690.1               | AY245690.1 | AY245690.1 |
| <i>Cryptoperidiniopsoid</i> sp. N          | AY251286.1               | -          | -          |

|                                                       |            |            |            |
|-------------------------------------------------------|------------|------------|------------|
| <i>Cryptoperidiniopsis</i> sp. NOAA Beach             | AY590486.1 | AY590486.1 | AY590486.1 |
| <i>Cryptoperidiniopsis</i> sp. PLO21                  | AY245691.1 | AY245691.1 | AY245691.1 |
| <i>Gymnodinium impudicum</i>                          | DQ785884.2 | MH732685.1 | DQ785884.2 |
| <i>Gyrodinium dominans</i>                            | FN669510.1 | FN669510.1 | FN669510.1 |
| <i>Gyrodinium instriatum</i>                          | DQ084522.1 | JN020160.1 | JN020162.1 |
| <i>Gyrodinium jinhaense</i>                           | MH665396.1 | MH665396.1 | MH665396.1 |
| <i>Gyrodinium lebouriae</i> (undescribed casual name) | -          | EF681914.2 | -          |
| <i>Gyrodinium moestrupii</i>                          | HE611580.1 | HE611580.1 | HE611580.1 |
| <i>Heterocapsa triquetra</i>                          | AF022198.1 | AF260401.1 | AF527816.1 |
| <i>Karenia brevis</i>                                 | AF274259.1 | AY355457.1 | FJ823562.1 |
| <i>Karlodinium veneficum</i>                          | KU314867.1 | MG737362.1 | KU314867.1 |
| <i>Lingulodinium polyedrum</i>                        | AF274269.1 | EF613357.1 | EU532481.  |
| <i>Peridinium williei</i>                             | AF274280.1 | AF260384.1 | -          |
| <i>Prorocentrum micans</i>                            | AY585526.2 | AF260377.1 | EU927523.1 |
| <i>Protoperidinium minutum</i>                        | GQ227501.1 | GQ227502.1 | -          |
| <i>Scrippsiella trochoidea</i>                        | AF274277.1 | AF260393.1 | MK930533.1 |

\* New sequences isolated from this study.
