# Supplementary figures and images for: Oleaginous Heterotrophic Dinoflagellates—Crypthecodiniaceae
Source: MDPI journal article supplement (doi:10.3390/md21030162), 2023-02-28

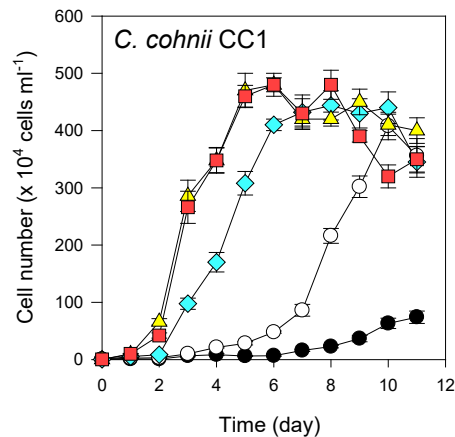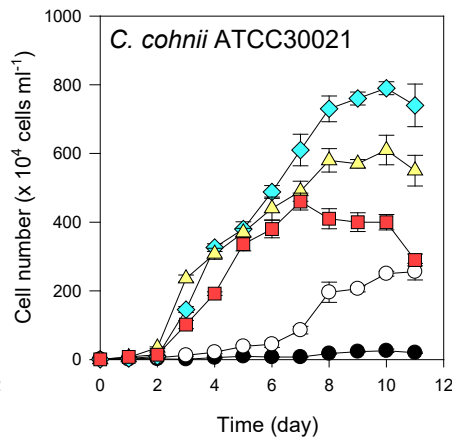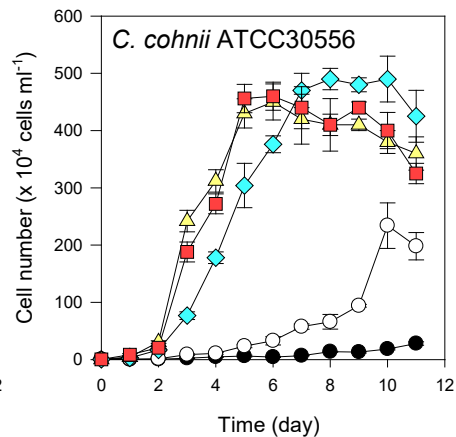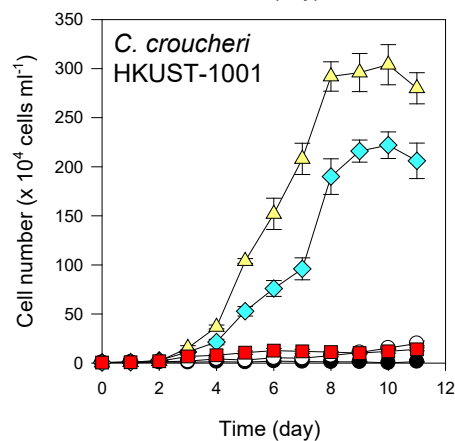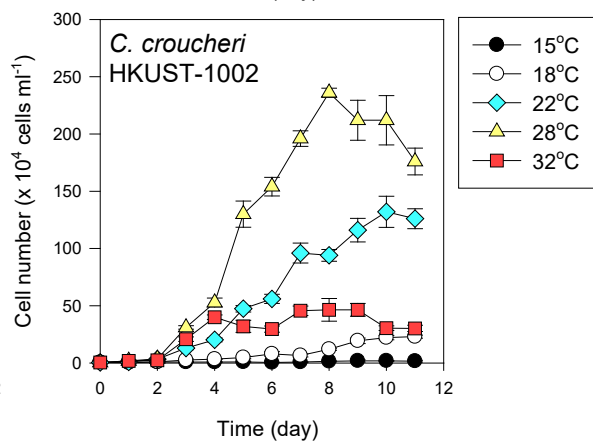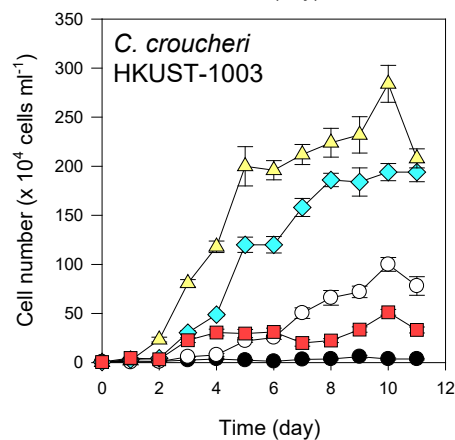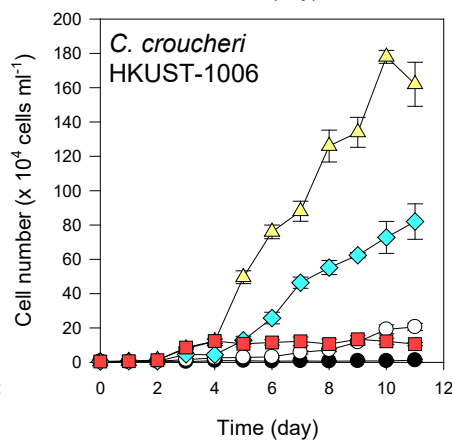

Supplement: s1 [file s1]

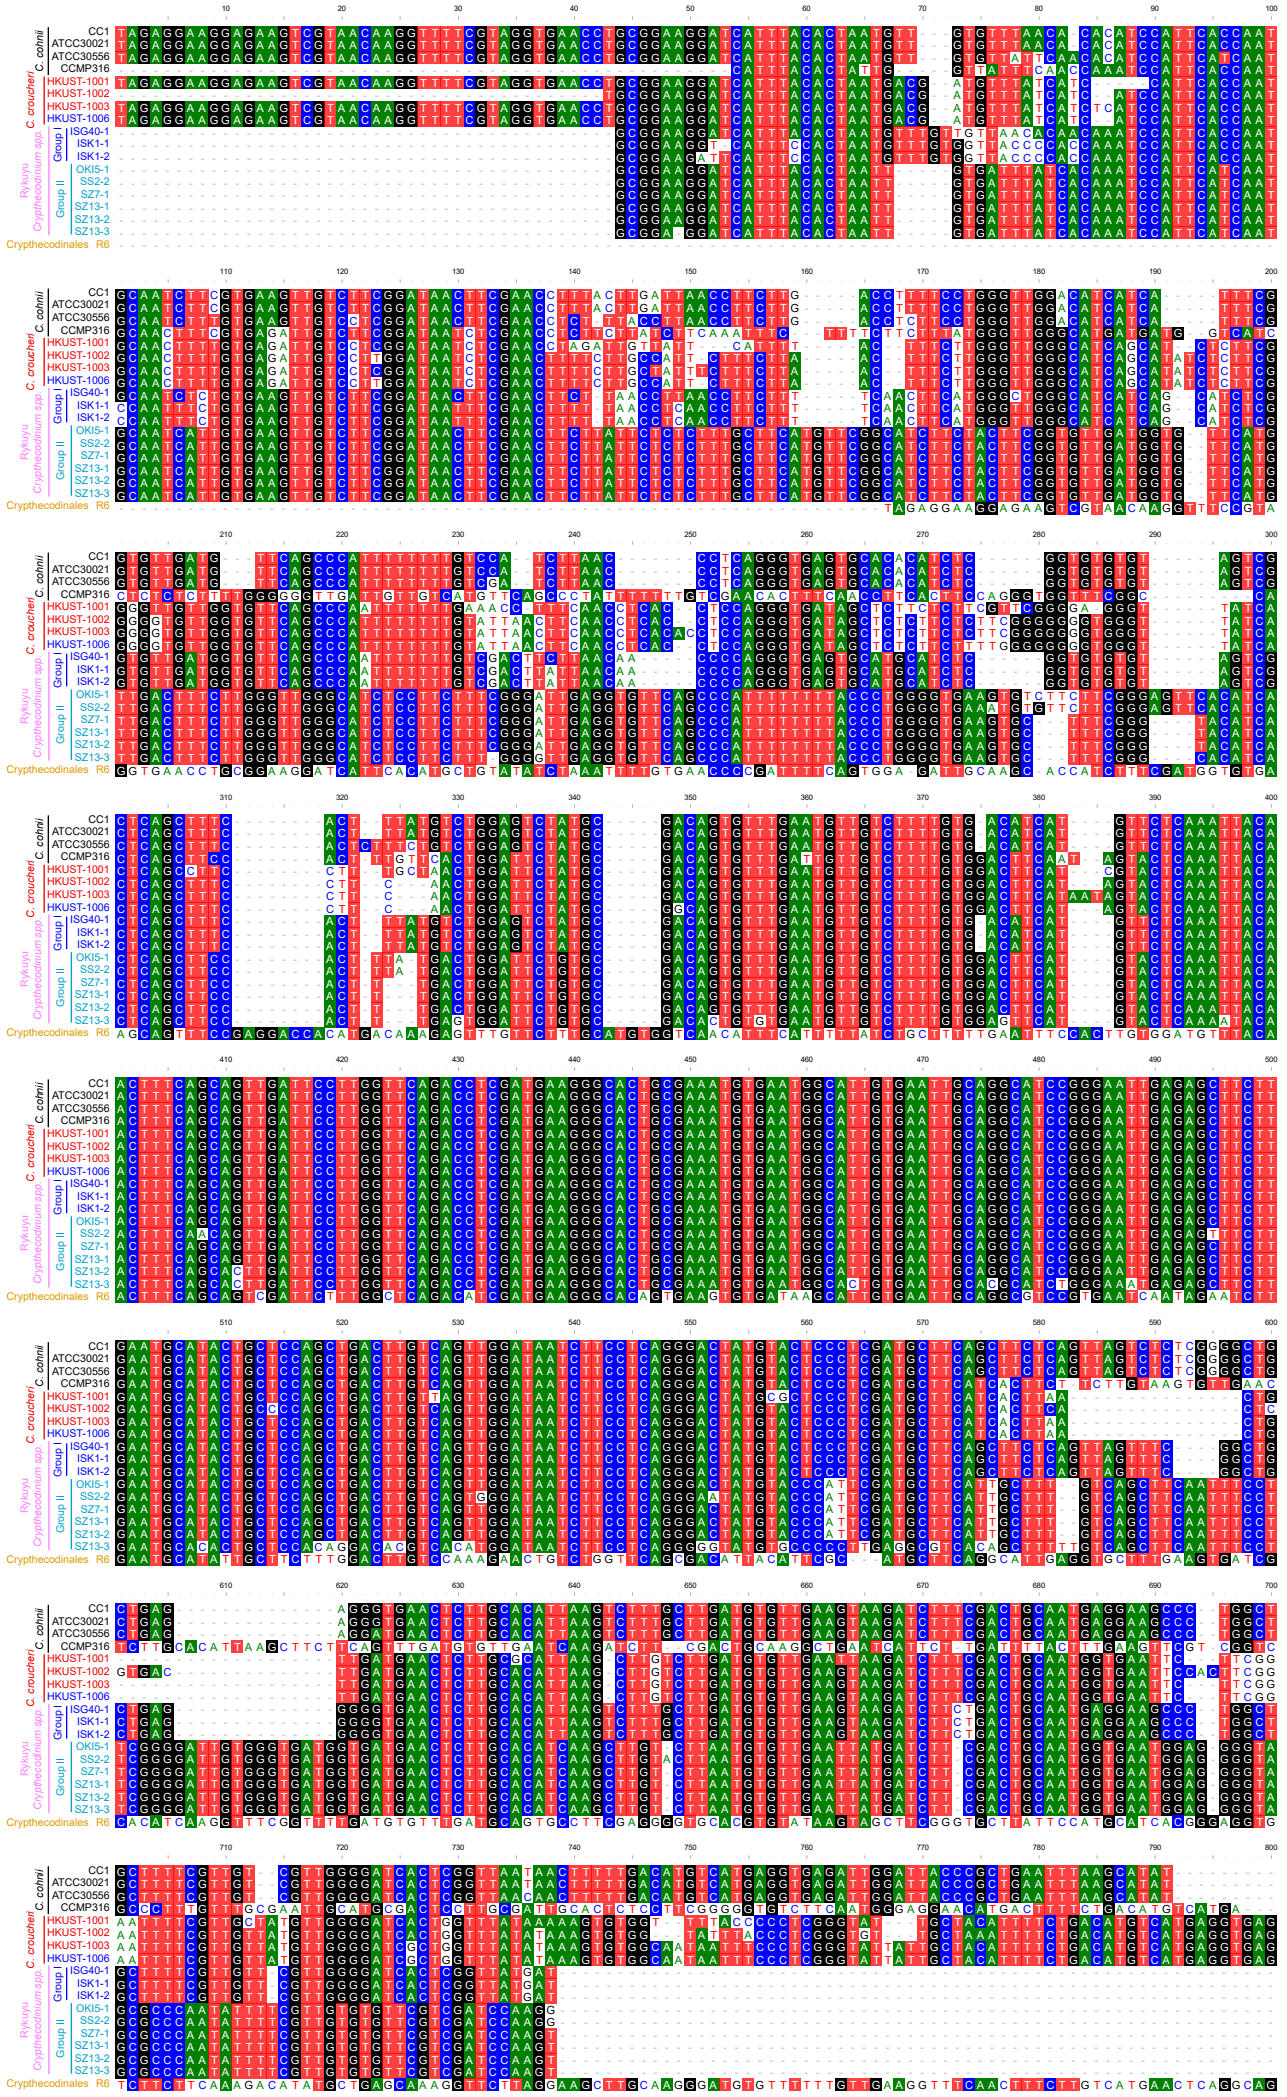

Supplement: s1 [file s1]
